# Supplementary material
Source: PubMed Central journal article supplement (PMC6629246)
Supplement: jciinsight-4-126241-s144.pdf [file jciinsight-4-126241-s144.pdf]

## SUPPLEMENTARY MATERIALS

### Microbial dysbiosis underlies high salt intake-associated hypertension

Jane F. Ferguson<sup>1,2</sup>, Luul A. Aden<sup>3</sup>, Natalia R. Barbaro<sup>3</sup>, Justin P. Van Beusecum<sup>3</sup>, Liang Xiao<sup>3</sup>, Alan J. Simons<sup>3</sup>, Cassandra Warden<sup>3</sup>, Lejla Pasic<sup>3</sup>, Lauren E. Himmel<sup>4</sup>, Mary K. Washington<sup>4</sup>, Frank L. Revetta<sup>4</sup>, Shilin Zhao<sup>5</sup>, Shivani Kumaresan<sup>3</sup>, Matthew B. Scholz<sup>6</sup>, Zhengzheng Tang<sup>7</sup>, Guanhua Chen<sup>7</sup>, Muredach P. Reilly<sup>8</sup>, and Annet Kirabo<sup>2,9</sup>.

<sup>1</sup>Division of Cardiovascular Medicine, Department of Medicine, Vanderbilt University Medical Center, Nashville, TN,

<sup>2</sup>Vanderbilt Translational and Clinical Cardiovascular Research Center (VTRACC), Vanderbilt University Medical Center, Nashville, TN

<sup>3</sup>Division of Clinical Pharmacology, Department of Medicine, Vanderbilt University Medical Center, Nashville, TN,

<sup>4</sup>Division of Comparative Medicine, Department of Pathology, Microbiology and Immunology, Vanderbilt University Medical Center, Nashville, Tennessee, USA

<sup>5</sup>Department of Biostatistics, Biomedical Informatics, Cancer Biology, and Health Policy, Vanderbilt University, Nashville, TN

<sup>6</sup>Vanderbilt Technologies for Advanced Genomics (VANTAGE) core facility, Vanderbilt University Medical Center, Nashville, TN

<sup>7</sup>Department of Biostatistics and Medical Informatics, University of Wisconsin-Madison, Madison, WI

<sup>8</sup>Cardiology Division, Department of Medicine, Columbia University Medical Center, New York NY, USA;

<sup>9</sup>Department of Molecular Physiology and Biophysics, Vanderbilt University, Nashville TN,

The authors have declared that no conflict of interest exists.

#### Address for correspondence:

Annet Kirabo, DVM, MSc, PhD, FAHA  
Room 536 Robinson Research Building  
Vanderbilt University  
Nashville, TN 37232-6602  
Telephone 615-343-0933-3049  
e-mail [annet.kirabo@vumc.org](mailto:annet.kirabo@vumc.org)

Jane Ferguson, PhD, FAHA  
2220 Pierce Avenue, Preston Research Building Room 354B  
Cardiovascular Medicine, Vanderbilt University Medical Center  
Nashville, TN 37232  
e-mail: [jane.f.ferguson@vumc.org](mailto:jane.f.ferguson@vumc.org)

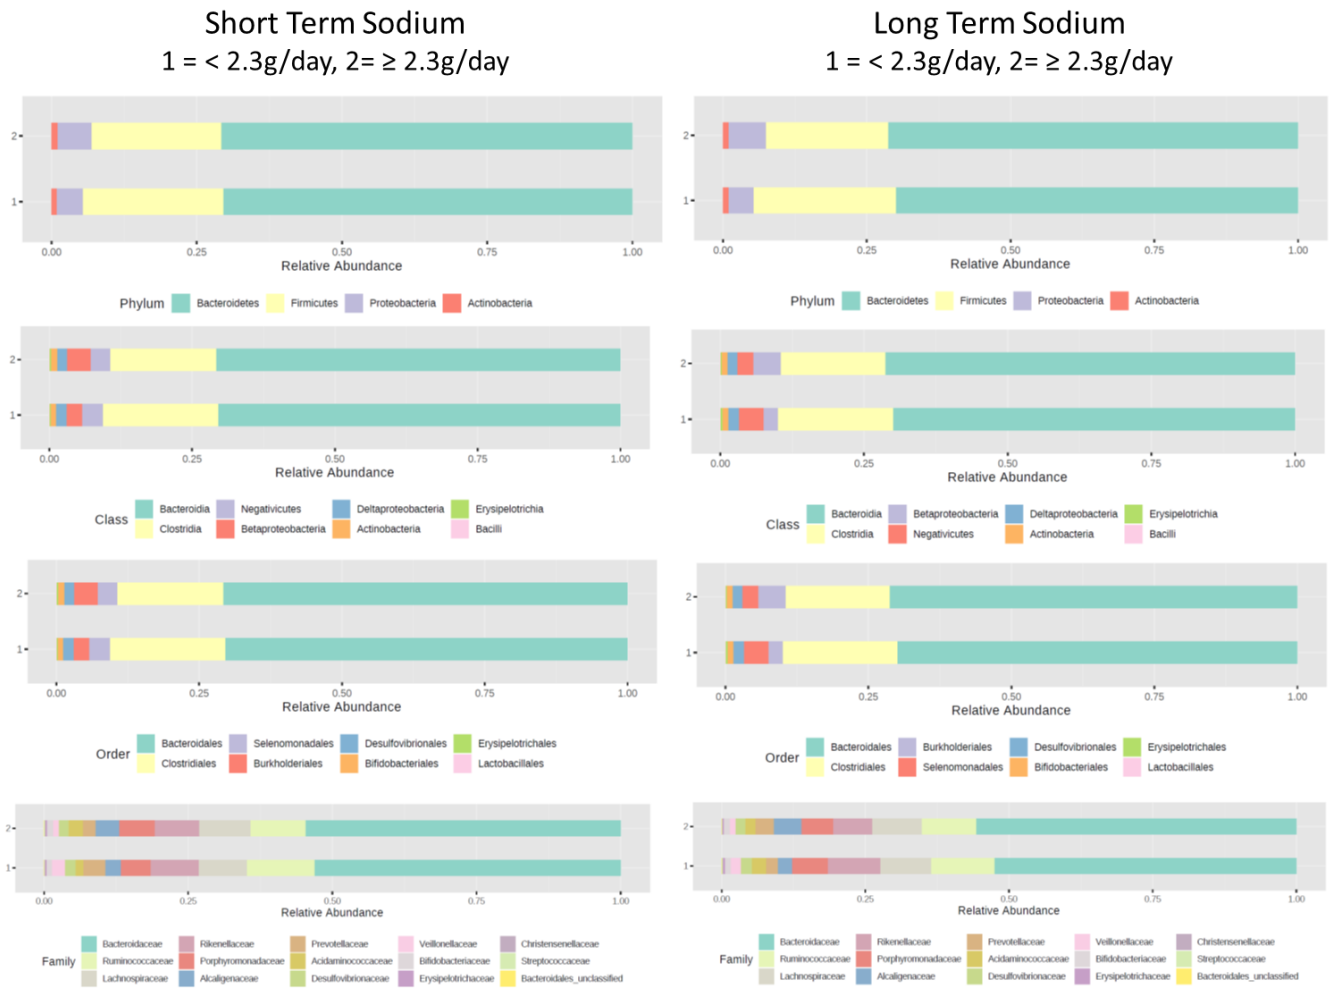

**Supplementary Figure 1:** Global patterns of differences in gut microbiota in humans consuming sodium above or below the recommendation of 2.3g/day, over short-term (previous week)-and long-term (previous year) periods at the Phylum, Class, Order and family levels.

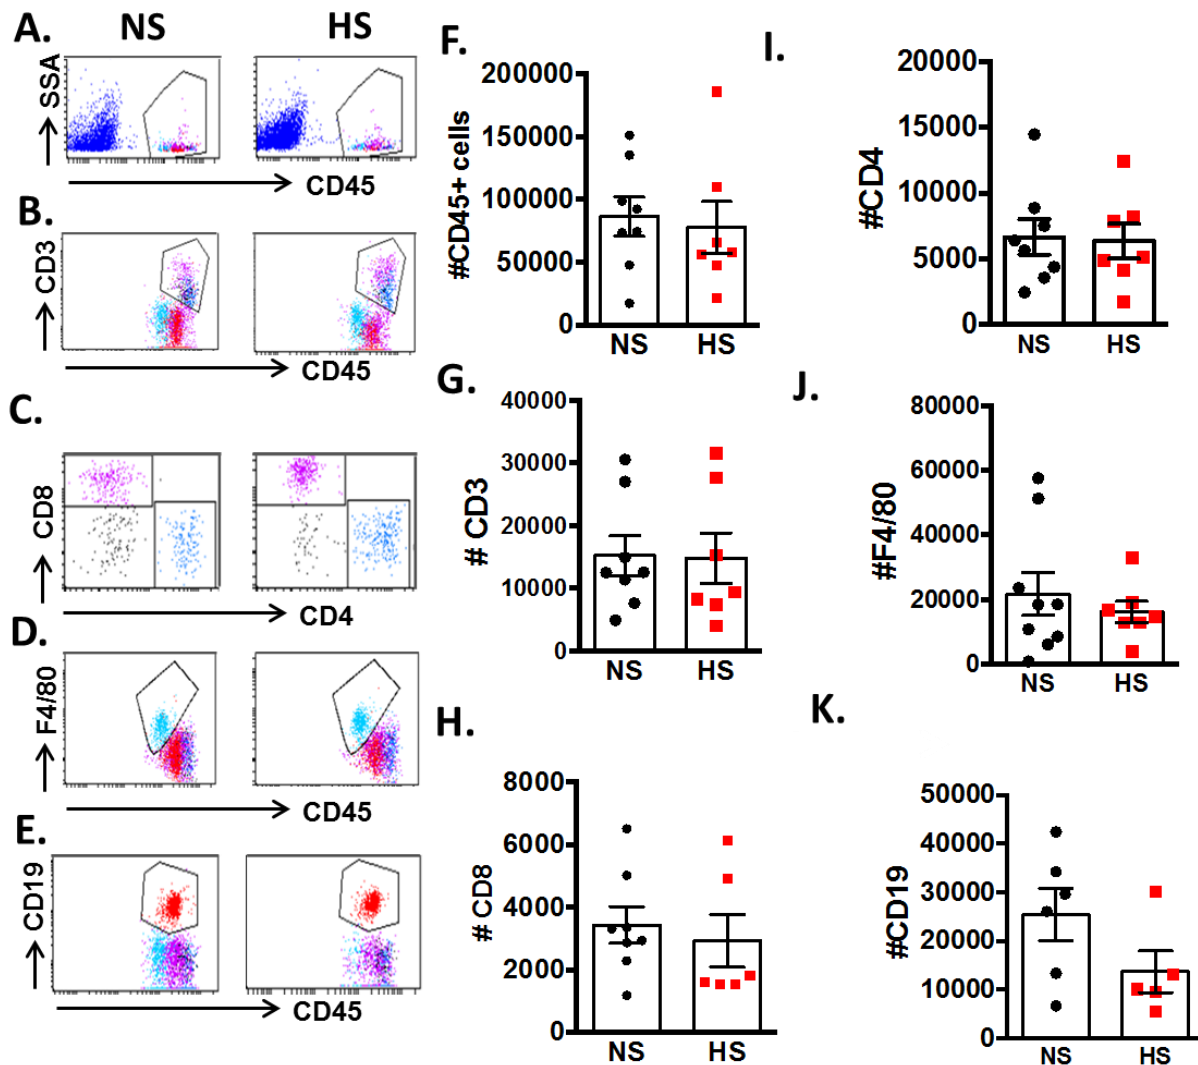

**Supplementary Figure 2: Effect of a high salt diet on renal inflammation.** Mice were fed a normal salt diet or a high salt diet, 8% NaCl for 3 weeks. Osmotic mini-pumps were implanted at three weeks to deliver a subcutaneous low dose of angiotensin II (140 mg/kg/hr) for 2 weeks. The mice were sacrificed, and single cell suspensions were prepared from freshly isolated mouse kidneys via enzymatic digestion and mechanical dissociation. Live cell singlets were analyzed for infiltrating renal inflammatory cells including CD45<sup>+</sup> total leukocytes (A & F), CD3<sup>+</sup> T lymphocytes (B & G), CD4<sup>+</sup>/CD8<sup>+</sup>T cell subsets (C, H & I), F4/80<sup>+</sup> monocytes and macrophages (D & J) and CD19<sup>+</sup> B lymphocytes (E & K).
